# Supplementary material for: Effects of the menstrual cycle on the performance of female football players. A systematic review
Source: Frontiers journal article supplement (doi:10.3389/fphys.2024.1359953), 2024-04-08
Supplement: Table_1.pdf [file Table_1.pdf]

Supplementary file 1: Search Strategies.

Table S1. Search strategies

| Platform | Search strategies                                                                                                                                                                                                                                                                               |
|----------|-------------------------------------------------------------------------------------------------------------------------------------------------------------------------------------------------------------------------------------------------------------------------------------------------|
| PubMed   | ((("female soccer players"[tw]) AND ("Menstrual Cycle"[Mesh] OR "Luteal Phase"[Mesh] OR "Follicular Phase"[Mesh]) AND ("Athletic Performance"[Mesh]))) OR ((("female soccer players"[tw]) AND ("Menstrual cycle" [tw] OR "Period" [tw]) AND ("performance"[tw] OR "Athletic performance"[tw]))) |
| SCOPUS   | ((("female soccer players") AND ("Menstrual Cycle" OR "Luteal Phase" OR "Follicular Phase") AND ("Athletic Performance"))) OR ((("female soccer players") AND ("Menstrual cycle" OR "Period" ) AND ("performance" OR "Athletic performance")))                                                  |

**Table S1.** Search strategies

| Platform       | Search strategies                                                                                                                                                                                                                                     |
|----------------|-------------------------------------------------------------------------------------------------------------------------------------------------------------------------------------------------------------------------------------------------------|
| BVS            | (tw:("female soccer players") AND Mh:"Menstrual Cycle" OR "Luteal Phase" OR "Follicular Phase") AND Mh:("Athletic Performance")) OR tw:(("female soccer players") AND ("Menstrual cycle" OR "Period" ) AND ("performance" OR "Athletic performance")) |
| Web of science | TS=((("female soccer players") AND ("Menstrual cycle" OR "Period" ) AND ("performance" OR "Athletic performance"))                                                                                                                                    |

**Table S1.** Search strategies

| Platform         | Search strategies                                                                                                                                                                                                                                |
|------------------|--------------------------------------------------------------------------------------------------------------------------------------------------------------------------------------------------------------------------------------------------|
| EBSCO            | ((("female soccer players") AND MH("Menstrual Cycle" OR "Luteal Phase" OR "Follicular Phase") AND MH("Athletic Performance")) OR ((("female soccer players") AND ("Menstrual cycle" OR "Period" ) AND ("performance" OR "Athletic performance")) |
| Cochrane library | #1 female soccer players 287                                                                                                                                                                                                                     |
|                  | #2 MeSH descriptor: [Menstrual Cycle] explode all trees 2004                                                                                                                                                                                     |
|                  | #3 MeSH descriptor: [Luteal Phase] explode all trees 564                                                                                                                                                                                         |
|                  | #4 MeSH descriptor: [Athletic Performance] explode all trees 8079                                                                                                                                                                                |
|                  | #5 menstrual cycle6089                                                                                                                                                                                                                           |
|                  | #6 Period 269012                                                                                                                                                                                                                                 |
|                  | #7 performance 123835                                                                                                                                                                                                                            |
|                  | #8 athletic performance 3823                                                                                                                                                                                                                     |
|                  | #9 ((#1) AND (#2 OR #3) AND (#4)) OR ((#1) AND (#5 OR #6) AND (#7 OR #8)) 26                                                                                                                                                                     |

Supplementary file 2: GRADE System.

Table S5: GRADE System.

Author(s): Dina Hamed-Hamed, Ana González-Muñoz, María Cuevas-Cervera, Jose Javier Perez-Montilla, Daniel Aguilar-Nuñez, María Aguilar-García, Leo Pruimboom, Santiago Navarro-Ledesma.

Question: Influence of menstruation compared to performance for women soccer players

Setting: Physiotherapy

Bibliography:

| Certainty assessment |                   |                      |                      |              |                           |                        | Impact                                                                                                                                                      | Certainty                                                                                       | Importance |
|----------------------|-------------------|----------------------|----------------------|--------------|---------------------------|------------------------|-------------------------------------------------------------------------------------------------------------------------------------------------------------|-------------------------------------------------------------------------------------------------|------------|
| Nº of studies        | Study design      | Risk of bias         | Inconsistency        | Indirectness | Imprecision               | Other considerations   |                                                                                                                                                             |                                                                                                 |            |
| New outcome          |                   |                      |                      |              |                           |                        |                                                                                                                                                             |                                                                                                 |            |
| 9                    | randomised trials | serious <sup>a</sup> | serious <sup>b</sup> | not serious  | very serious <sup>c</sup> | dose response gradient | Four studies showed changes in performance during the phases of the menstrual cycle, while the remaining five studies showed no oscillations in performance | <br>Very low | IMPORTANT  |

CI: confidence interval

Explanations

- a. Due to the lack of sequence concealment in all studies and the unclear risk of blinding of participants and staff, it is not clear whether the studies were conducted in a blinded manner.
- b. Four studies had significant differences, while 5 studies had no significant differences.
- c. Due to the sample analysis analyzed (<400)
